# Supplementary material
Source: publisher site journal article supplement (https://www.spandidos-publications.com/3493/downloadSupplementary)
Supplement: Supplementary file 1 [file downloadSupplementary]

## Sheet: Sheet1
Table SV.
Upstream Regulator	Molecule Type	P-value of overlap	Target Molecules in Dataset
HR	transcription regulator	0.00205	COL6A1
SPDEF	transcription regulator	0.0031	COL6A1
JUND	transcription regulator	0.00364	COL6A1
SMAD7	transcription regulator	0.00692	COL6A1
TWIST1	transcription regulator	0.00752	COL6A1
SREBF1	transcription regulator	0.0115	COL6A1
SMAD3	transcription regulator	0.0117	COL6A1
FOS	transcription regulator	0.0256	COL6A1
HTT	transcription regulator	0.0325	COL6A1
© 2000-2020 QIAGEN. All rights reserved.
